# Supplementary material for: Castanea spp. Nut Traceability: A Multivariate Strategy Based on Phytochemical Data
Source: MDPI journal article supplement (doi:10.3390/app132212524), 2023-11-20
Supplement: s1 [file s1]

## Supplementary Materials

Table S1: Chromatographic conditions of the used methods.

| Method   | Compounds of interest             | Stationary phase                                        | Mobile phase                                                                                                                                                            | Analysis                                                        | Flow (mL min <sup>-1</sup> ) | Wavelength (nm) |
|----------|-----------------------------------|---------------------------------------------------------|-------------------------------------------------------------------------------------------------------------------------------------------------------------------------|-----------------------------------------------------------------|------------------------------|-----------------|
| <b>A</b> | cinnamic acids, flavonols         | KINETEX—C18 column (4.6 × 150 mm, 5 μm)                 | A: 10 mM KH <sub>2</sub> PO <sub>4</sub> /H <sub>3</sub> PO <sub>4</sub> , pH = 2.8<br>B: CH <sub>3</sub> CN                                                            | gradient analysis: 5% B to 21% B in 17 min + 21% B in 3 min     | 1.5                          | 330             |
| <b>B</b> | benzoic acids, catechins, tannins | KINETEX—C18 column (4.6 × 150 mm, 5 μm)                 | A: H <sub>2</sub> O/CH <sub>3</sub> OH/HCOOH (5:95:0.1, v/v/v), pH = 2.5<br>B: CH <sub>3</sub> OH/HCOOH (100:0.1, v/v)                                                  | gradient analysis: 3% B to 85% B in 22 min + 85% B in 1 min     | 0.6                          | 280             |
| <b>C</b> | monoterpenes                      | KINETEX—C18 column (4.6 × 150 mm, 5 μm)                 | A: H <sub>2</sub> O<br>B: CH <sub>3</sub> CN                                                                                                                            | gradient analysis: 30% B to 56% B in 15 min + 56% B in 2 min    | 1.0                          | 210-250         |
| <b>D</b> | organic acids                     | KINETEX—C18 column (4.6 × 150 mm, 5 μm)                 | A: 10 mM KH <sub>2</sub> PO <sub>4</sub> /H <sub>3</sub> PO <sub>4</sub> , pH = 2.8<br>B: CH <sub>3</sub> CN                                                            | gradient analysis: 5% B to 14.4% B in 10 min + 14.4% B in 2 min | 0.6                          | 214             |
| <b>E</b> | vitamins                          | KINETEX—C18 column (4.6 × 150 mm, 5 μm)                 | A: 50 mM KH <sub>2</sub> PO <sub>4</sub><br>B: 5 mM C <sub>16</sub> H <sub>33</sub> N(CH <sub>3</sub> ) <sub>3</sub> Br/CH <sub>3</sub> OH/H <sub>2</sub> O (5:95, v/v) | isocratic analysis: ratio of phase A and B: 95:5 in 10 min      | 0.9                          | 261, 348        |
| <b>F</b> | sugars                            | SphereClone—NH <sub>2</sub> column (4.6 × 250 mm, 5 μm) | A: H <sub>2</sub> O<br>B: CH <sub>3</sub> CN                                                                                                                            | isocratic analysis: ratio of phase A and B: 5:85 in 12 min      | 0.5                          | 267             |

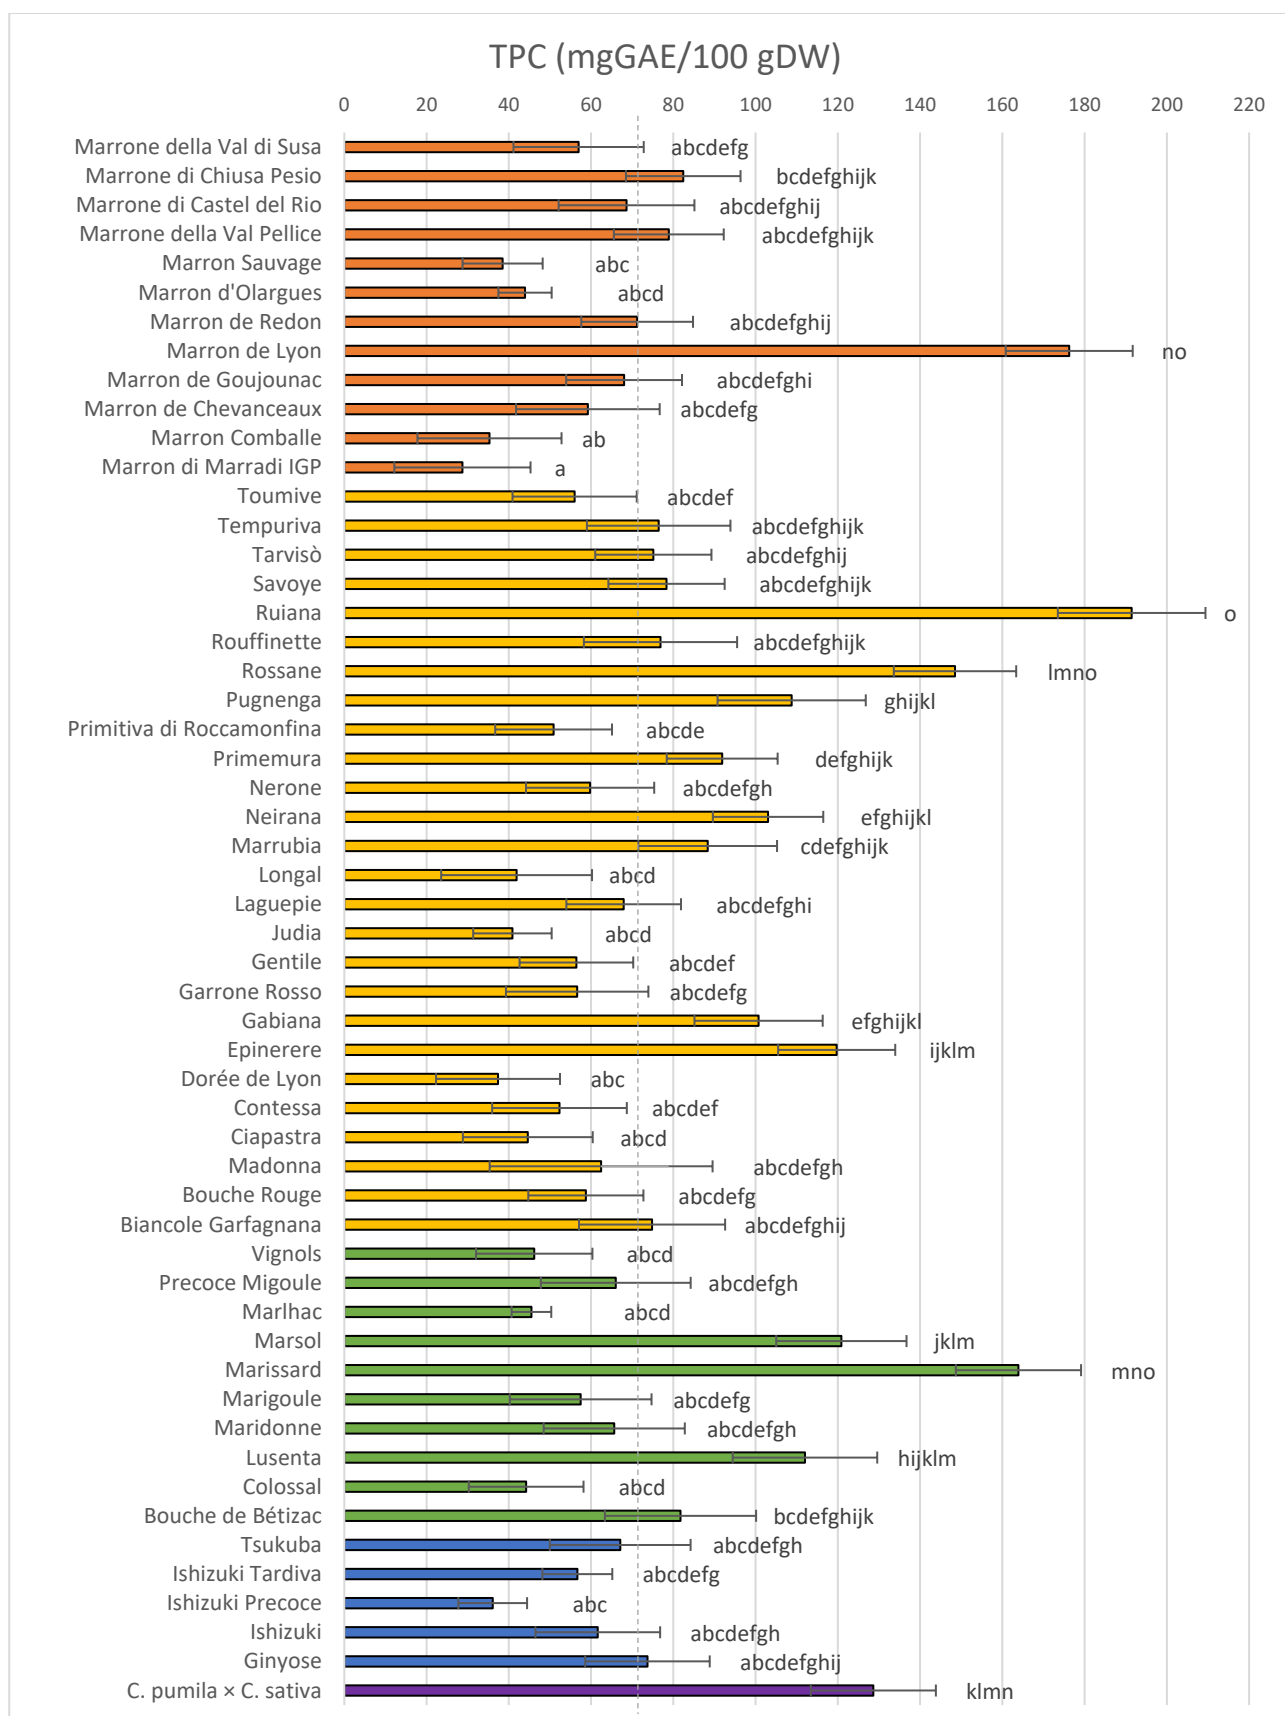

**Figure S1:** Total polyphenol content of the 54 chestnut cultivars. Different letters for each cultivar indicate the significant differences at  $p < 0.05$ . Orange colour: marrone-type chestnut (MT); yellow colour: sweet chestnut (SC); green colour: Euro-Japanese hybrid (EH); blue colour: Japanese chestnut (JC); purple colour: *C. pumila* hybrid (PH). The dashed line indicates the average.

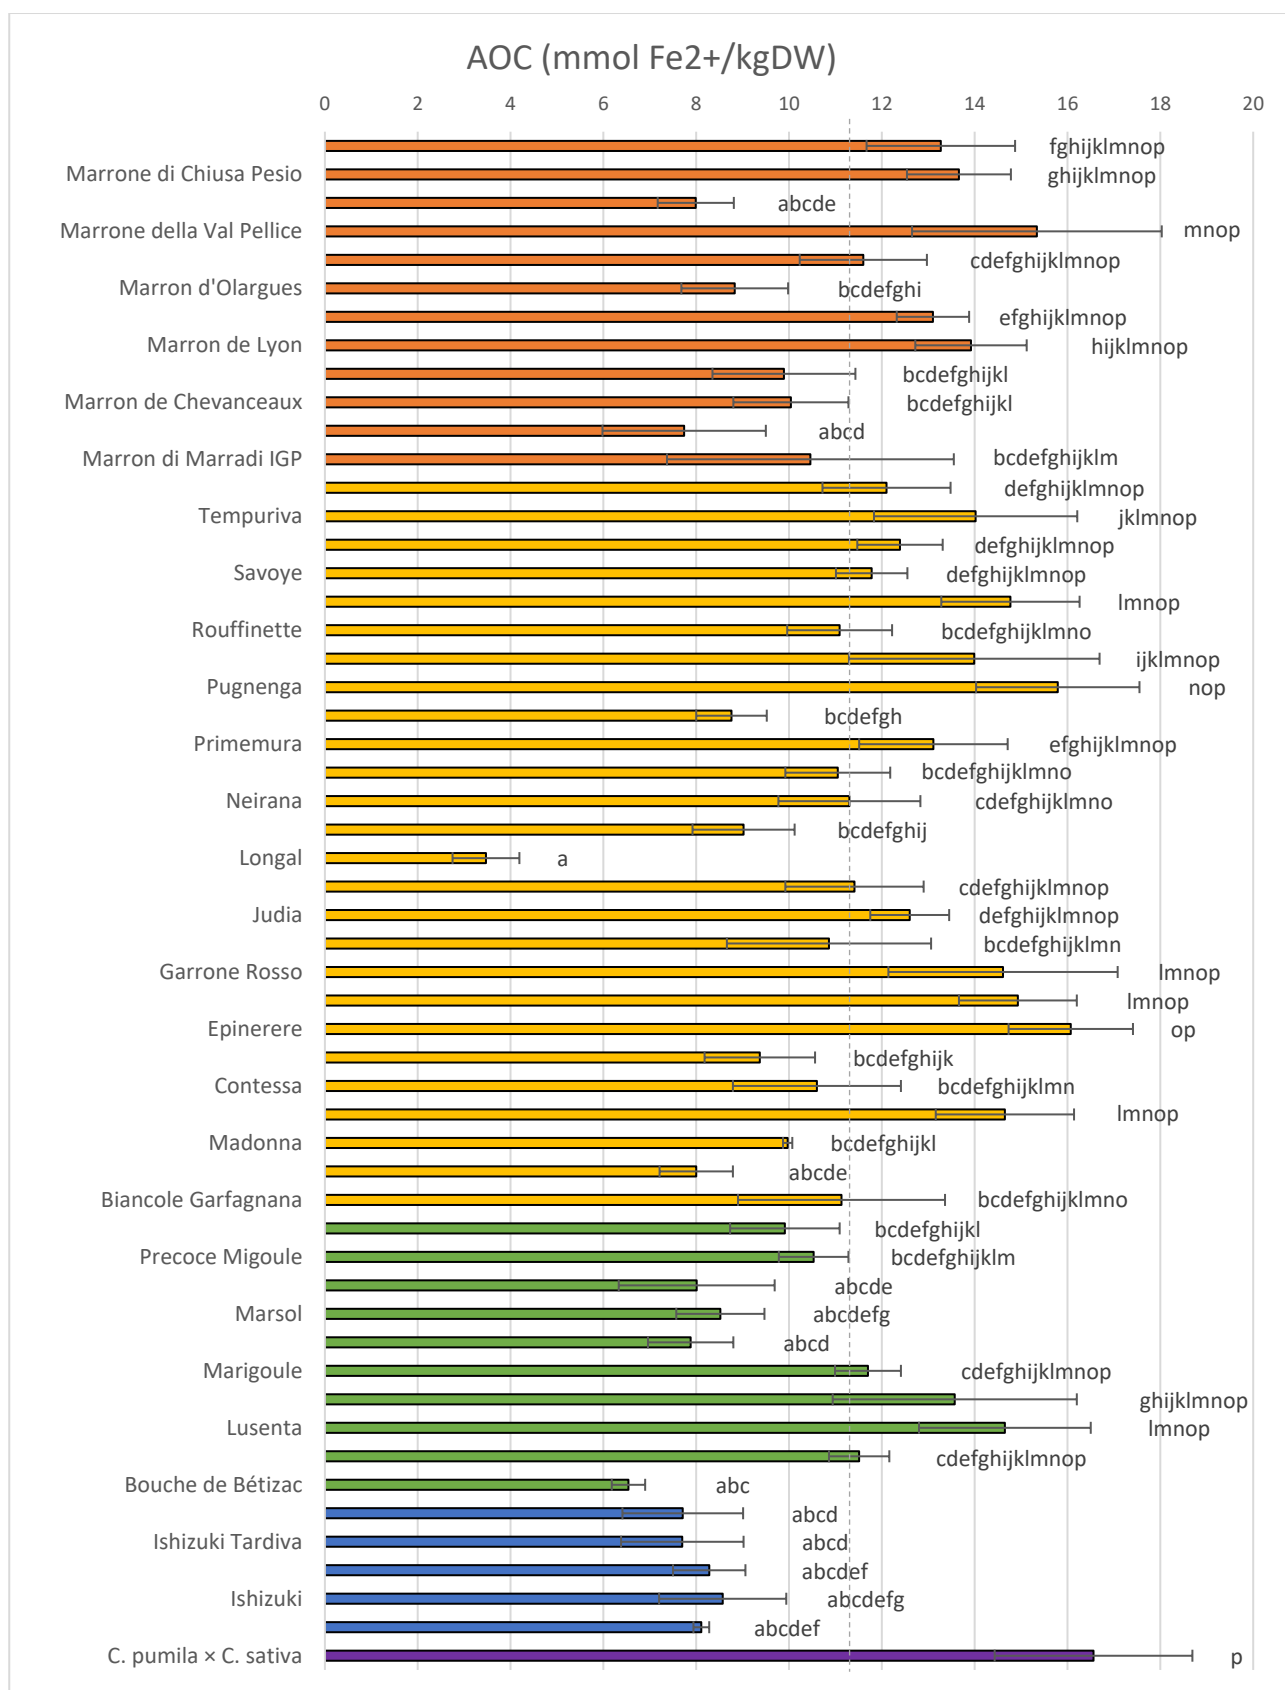

**Figure S2: Antioxidant activity of the 54 chestnut cultivars.** Different letters for each cultivar indicate the significant differences at  $p < 0.05$ . Orange colour: marrone-type chestnut (MT); yellow colour: sweet chestnut (SC); green colour: Euro-Japanese hybrid (EH); blue colour: Japanese chestnut (JC); purple colour: *C. pumila* hybrid (PH). The dashed line indicates the average.

Table S2: Chestnut phytochemical class profiles.

| Cv. Type  | Cultivar                            | ID  | Cinnamic Acids<br>(mg/100 g <sub>DW</sub> ) | Flavonols<br>(mg/100 g <sub>DW</sub> ) | Benzoic Acids<br>(mg/100 g <sub>DW</sub> ) | Catechins<br>(mg/100 g <sub>DW</sub> ) | Tannins<br>(mg/100 g <sub>DW</sub> ) | Monoterpenes<br>(mg/100 g <sub>DW</sub> ) | Vitamin C<br>(mg/100 g <sub>DW</sub> ) |
|-----------|-------------------------------------|-----|---------------------------------------------|----------------------------------------|--------------------------------------------|----------------------------------------|--------------------------------------|-------------------------------------------|----------------------------------------|
| <b>PH</b> | <i>C. pumila</i> × <i>C. sativa</i> | K24 | 43.48 ± 1.43 <sup>γ</sup>                   | 12.66 ± 0.40 <sup>ij</sup>             | 3.30 ± 0.58 <sup>abcde</sup>               | 25.89 ± 1.21 <sup>qr</sup>             | 27.14 ± 0.05 <sup>defg</sup>         | 1.32 ± 0.07 <sup>a</sup>                  | 9.45 ± 0.03 <sup>r</sup>               |
| <b>JC</b> | Ginyose                             | D18 | 15.23 ± 0.05 <sup>ghijklmnopqr</sup>        | 1.28 ± 0.43 <sup>abc</sup>             | 2.16 ± 0.40 <sup>abc</sup>                 | 73.09 ± 4.26 <sup>t</sup>              | 4.68 ± 0.10 <sup>a</sup>             | 97.21 ± 2.22 <sup>abcdef</sup>            | n.d.                                   |
|           | Ishizuki                            | F23 | 14.42 ± 0.10 <sup>fghijklmn</sup>           | n.d.                                   | 0.62 ± 0.20 <sup>a</sup>                   | 13.99 ± 0.14 <sup>abcdef</sup>         | 11.91 ± 0.15 <sup>abcd</sup>         | 129.03 ± 1.22 <sup>abcdef</sup>           | n.d.                                   |
|           | Ishizuki Precoce                    | O15 | 21.73 ± 0.21 <sup>xy</sup>                  | 7.18 ± 0.39 <sup>defghij</sup>         | 0.72 ± 0.01 <sup>a</sup>                   | 22.95 ± 0.03 <sup>mnopqr</sup>         | 7.30 ± 0.03 <sup>abc</sup>           | n.d.                                      | 7.40 ± 0.26 <sup>pq</sup>              |
|           | Ishizuki Tardiva                    | E17 | 6.46 ± 0.01 <sup>bc</sup>                   | n.d.                                   | 0.57 ± 0.02 <sup>a</sup>                   | 7.95 ± 0.08 <sup>abc</sup>             | 17.87 ± 0.21 <sup>abcdef</sup>       | 14.41 ± 0.04 <sup>abcd</sup>              | n.d.                                   |
|           | Tsukuba                             | G14 | 0.62 ± 0.02 <sup>a</sup>                    | 1.36 ± 0.03 <sup>abc</sup>             | 0.87 ± 0.03 <sup>ab</sup>                  | 6.80 ± 0.84 <sup>ab</sup>              | 13.43 ± 0.03 <sup>abcd</sup>         | 75.81 ± 2.05 <sup>abcde</sup>             | n.d.                                   |
| <b>EH</b> | Bouche de Bétizac                   | I10 | 12.65 ± 0.04 <sup>fghij</sup>               | n.d.                                   | 4.44 ± 0.05 <sup>abcdef</sup>              | 14.37 ± 0.03 <sup>bdefghijk</sup>      | 12.04 ± 0.05 <sup>abcd</sup>         | n.d.                                      | 5.87 ± 0.10 <sup>iklm</sup>            |
|           | Colossal                            | M22 | 14.78 ± 0.05 <sup>fghijklmno</sup>          | 1.19 ± 0.12 <sup>abc</sup>             | 2.77 ± 0.07 <sup>abcd</sup>                | 12.94 ± 1.40 <sup>abcdefghi</sup>      | 16.02 ± 0.14 <sup>abcde</sup>        | 169.37 ± 9.44 <sup>abcdefg</sup>          | n.d.                                   |
|           | Lusenta                             | M15 | 20.46 ± 0.09 <sup>vwxxy</sup>               | 11.49 ± 0.36 <sup>j</sup>              | 12.13 ± 0.12 <sup>hijklmno</sup>           | 18.81 ± 0.05 <sup>ghijklmnopq</sup>    | 21.38 ± 0.15 <sup>h</sup>            | n.d.                                      | 10.25 ± 0.09 <sup>s</sup>              |
|           | Maridonne                           | J14 | 22.14 ± 0.29 <sup>yz</sup>                  | 3.36 ± 0.16 <sup>abcdefgh</sup>        | 0.50 ± 0.08 <sup>a</sup>                   | 5.30 ± 0.64 <sup>a</sup>               | 22.34 ± 0.79 <sup>abcdef</sup>       | 420.32 ± 6.38 <sup>bdefghi</sup>          | 3.82 ± 0.06 <sup>efgh</sup>            |
|           | Marigoule                           | J13 | 12.05 ± 0.09 <sup>efgh</sup>                | 6.57 ± 0.02 <sup>cdefghij</sup>        | 1.86 ± 0.01 <sup>abc</sup>                 | 15.44 ± 0.12 <sup>cdefghijklm</sup>    | 9.76 ± 0.02 <sup>abcd</sup>          | n.d.                                      | 9.20 ± 0.06 <sup>r</sup>               |
|           | Marissard                           | N14 | 18.85 ± 0.01 <sup>qrstuvwxy</sup>           | n.d.                                   | 7.86 ± 0.03 <sup>cdefghij</sup>            | 11.11 ± 0.02 <sup>abcdefg</sup>        | 7.96 ± 0.12 <sup>abc</sup>           | n.d.                                      | 5.56 ± 0.01 <sup>ijkl</sup>            |
|           | Marlhac                             | K05 | 2.28 ± 0.01 <sup>a</sup>                    | n.d.                                   | 16.53 ± 0.01 <sup>nopq</sup>               | 19.31 ± 0.02 <sup>ijklmnopq</sup>      | 8.64 ± 0.08 <sup>abc</sup>           | n.d.                                      | 5.78 ± 0.09 <sup>ijkl</sup>            |
|           | Marsol                              | F06 | 14.74 ± 0.03 <sup>fghijklmno</sup>          | n.d.                                   | 14.94 ± 0.02 <sup>klmnopq</sup>            | 22.95 ± 0.02 <sup>mnopqr</sup>         | 16.52 ± 0.41 <sup>abcde</sup>        | n.d.                                      | n.d.                                   |
|           | Precoce Migoule                     | G18 | 17.29 ± 0.02 <sup>mnopqrstuv</sup>          | n.d.                                   | 0.43 ± 0.01 <sup>a</sup>                   | 13.66 ± 0.01 <sup>bdefghij</sup>       | 11.90 ± 0.18 <sup>abcd</sup>         | n.d.                                      | 5.55 ± 0.01 <sup>ijkl</sup>            |
| <b>SC</b> | Vignols                             | I17 | 19.62 ± 0.42 <sup>tuvwxyz</sup>             | 2.22 ± 0.14 <sup>ghij</sup>            | 16.21 ± 0.04 <sup>nopq</sup>               | 23.99 ± 0.37 <sup>pqr</sup>            | 34.97 ± 0.24 <sup>fgh</sup>          | 901.68 ± 4.21 <sup>lm</sup>               | 12.32 ± 0.01 <sup>t</sup>              |
|           | Biancole Garfagnana                 | B03 | 13.28 ± 0.09 <sup>fghijk</sup>              | n.d.                                   | 9.05 ± 0.55 <sup>defghijk</sup>            | 20.83 ± 0.29 <sup>ijklmnopq</sup>      | 9.98 ± 0.46 <sup>abcd</sup>          | 259.23 ± 9.99 <sup>abcdefghi</sup>        | n.d.                                   |
|           | Bouche Rouge                        | I18 | 15.85 ± 0.16 <sup>ijklmnopqrs</sup>         | 0.43 ± 0.09 <sup>a</sup>               | 2.34 ± 0.21 <sup>abc</sup>                 | 5.71 ± 0.90 <sup>a</sup>               | 12.05 ± 0.37 <sup>abcd</sup>         | 107.21 ± 5.83 <sup>abcdef</sup>           | 5.95 ± 0.01 <sup>iklm</sup>            |
|           | Ciapastra                           | T02 | 11.17 ± 0.28 <sup>def</sup>                 | 1.40 ± 0.03 <sup>abcdefghi</sup>       | 7.49 ± 0.81 <sup>cdefghi</sup>             | 18.74 ± 3.36 <sup>cdefghijkl</sup>     | 24.39 ± 0.09 <sup>bdefg</sup>        | 224.21 ± 13.26 <sup>abcdefg</sup>         | 3.19 ± 0.06 <sup>d</sup>               |
|           | Contessa                            | L02 | 16.35 ± 0.13 <sup>ijklmnopqrstu</sup>       | 0.23 ± 0.08 <sup>a</sup>               | 17.52 ± 1.97 <sup>nopq</sup>               | 10.22 ± 0.90 <sup>abcdef</sup>         | 10.93 ± 0.11 <sup>abcd</sup>         | 588.06 ± 30.76 <sup>ghij</sup>            | n.d.                                   |
|           | Dorée de Lyon                       | H23 | 17.04 ± 0.06 <sup>klmnopqrstuv</sup>        | 1.15 ± 0.05 <sup>abc</sup>             | 5.65 ± 0.04 <sup>abcdefg</sup>             | 18.97 ± 0.03 <sup>ijklmnopq</sup>      | 5.44 ± 0.09 <sup>a</sup>             | n.d.                                      | 6.87 ± 0.09 <sup>op</sup>              |
|           | Epinerere                           | M16 | 28.21 ± 0.39 <sup>αβ</sup>                  | 1.85 ± 0.45 <sup>abcd</sup>            | 6.55 ± 0.01 <sup>abcdefgh</sup>            | 18.93 ± 0.66 <sup>hijklmnopq</sup>     | 21.07 ± 0.07 <sup>abcdef</sup>       | 234.33 ± 2.17 <sup>abcdefg</sup>          | 1.38 ± 0.43 <sup>b</sup>               |

|    |                           |     |                                      |                                  |                                  |                                     |                                |                                    |                              |
|----|---------------------------|-----|--------------------------------------|----------------------------------|----------------------------------|-------------------------------------|--------------------------------|------------------------------------|------------------------------|
|    | Gabiana                   | O03 | 18.48 ± 0.29 <sup>opqrstuvwxy</sup>  | n.d.                             | 11.45 ± 0.12 <sup>ghijklmn</sup> | 23.30 ± 0.19 <sup>nopqr</sup>       | 11.69 ± 0.27 <sup>abcd</sup>   | 625.93 ± 35.08 <sup>ijkl</sup>     | 3.61 ± 0.23 <sup>def</sup>   |
|    | Garrone Rosso             | I03 | 18.99 ± 0.13 <sup>rstuvwxy</sup>     | n.d.                             | 15.59 ± 0.35 <sup>lmnopq</sup>   | 15.82 ± 0.51 <sup>defghijklmn</sup> | 18.58 ± 0.21 <sup>abcdef</sup> | 815.87 ± 19.80 <sup>klm</sup>      | 5.90 ± 0.02 <sup>ijklm</sup> |
|    | Gentile                   | P12 | 4.06 ± 0.03 <sup>ab</sup>            | 1.59 ± 0.05 <sup>abcd</sup>      | 3.67 ± 0.05 <sup>abcdef</sup>    | 23.52 ± 0.41 <sup>nopqr</sup>       | 12.70 ± 0.11 <sup>abcd</sup>   | n.d.                               | 5.42 ± 0.39 <sup>ijk</sup>   |
|    | Judia                     | F21 | 31.70 ± 0.63 <sup>β</sup>            | 7.53 ± 1.36 <sup>efghij</sup>    | 4.86 ± 0.45 <sup>abcdef</sup>    | 18.31 ± 0.14 <sup>cdefghijklm</sup> | 15.03 ± 0.16 <sup>abcde</sup>  | 185.34 ± 5.72 <sup>abcdefg</sup>   | 3.14 ± 0.62 <sup>d</sup>     |
|    | Laguepie                  | H24 | 18.04 ± 0.09 <sup>opqrstuvwxy</sup>  | 3.18 ± 0.01 <sup>abcdefgh</sup>  | 13.15 ± 0.12 <sup>ijklmnop</sup> | 29.42 ± 0.05 <sup>r</sup>           | 15.95 ± 0.58 <sup>abcde</sup>  | 540.38 ± 0.25 <sup>ijk</sup>       | 6.00 ± 0.13 <sup>klmn</sup>  |
|    | Longal                    | E16 | 25.83 ± 0.10 <sup>zu</sup>           | 8.62 ± 0.03 <sup>hij</sup>       | 11.97 ± 0.01 <sup>hijklmno</sup> | 9.50 ± 0.51 <sup>abcdef</sup>       | 15.54 ± 0.44 <sup>abcde</sup>  | 725.50 ± 6.30 <sup>abcdefghi</sup> | 3.45 ± 0.15 <sup>de</sup>    |
|    | Marrubia                  | Q13 | 13.43 ± 0.36 <sup>fghijkl</sup>      | 1.74 ± 0.04 <sup>abcd</sup>      | 1.57 ± 0.05 <sup>abc</sup>       | 14.83 ± 0.07 <sup>cdefghijkl</sup>  | 10.18 ± 0.17 <sup>abcd</sup>   | n.d.                               | 4.20 ± 0.14 <sup>fgh</sup>   |
|    | Neirana                   | U09 | 20.02 ± 0.15 <sup>uvwxy</sup>        | 0.27 ± 0.05 <sup>a</sup>         | 18.62 ± 0.46 <sup>pq</sup>       | 8.33 ± 1.00 <sup>abcd</sup>         | 21.11 ± 0.22 <sup>abcdef</sup> | 517.13 ± 17.73 <sup>hijk</sup>     | n.d.                         |
|    | Nerone                    | H08 | 18.77 ± 0.02 <sup>pqrstuvwxy</sup>   | n.d.                             | 7.13 ± 0.36 <sup>bcdefghi</sup>  | 10.43 ± 0.19 <sup>abcdef</sup>      | 6.31 ± 0.34 <sup>ab</sup>      | 241.59 ± 11.21 <sup>abcdefg</sup>  | 5.96 ± 0.19 <sup>ijklm</sup> |
|    | Primemura                 | X05 | 17.34 ± 0.21 <sup>fghijklm</sup>     | 1.40 ± 0.15 <sup>abc</sup>       | 1.82 ± 0.20 <sup>abcdef</sup>    | 14.14 ± 2.17 <sup>bcdefghij</sup>   | 24.79 ± 0.43 <sup>cdefg</sup>  | 351.46 ± 10.60 <sup>defghij</sup>  | 3.84 ± 0.08 <sup>efgh</sup>  |
|    | Primitiva di Roccamonfina | I07 | 19.32 ± 0.12 <sup>stuvwxy</sup>      | n.d.                             | 2.29 ± 0.04 <sup>abc</sup>       | 23.76 ± 0.16 <sup>opqr</sup>        | 8.42 ± 0.25 <sup>abc</sup>     | 1.63 ± 0.41 <sup>a</sup>           | 5.73 ± 0.02 <sup>ijkl</sup>  |
|    | Pugnenga                  | P04 | 62.89 ± 0.22 <sup>δ</sup>            | 6.24 ± 0.04 <sup>bcdefghij</sup> | 17.41 ± 0.06 <sup>nopq</sup>     | 23.79 ± 0.29 <sup>opqr</sup>        | 14.22 ± 0.34 <sup>abcde</sup>  | 28.20 ± 0.15 <sup>ab</sup>         | 5.50 ± 0.16 <sup>ijkl</sup>  |
|    | Rossane                   | N13 | 12.84 ± 0.45 <sup>fghij</sup>        | 1.81 ± 0.02 <sup>abcd</sup>      | 26.73 ± 0.02 <sup>r</sup>        | 26.10 ± 0.41 <sup>qr</sup>          | 14.91 ± 0.35 <sup>abcde</sup>  | n.d.                               | 5.79 ± 0.13 <sup>ijkl</sup>  |
|    | Rouffinette               | O11 | 12.36 ± 0.13 <sup>fghi</sup>         | 0.98 ± 0.01 <sup>abc</sup>       | 11.44 ± 0.01 <sup>ghijklmn</sup> | 25.70 ± 0.37 <sup>qr</sup>          | 5.78 ± 0.09 <sup>a</sup>       | 17.00 ± 0.13 <sup>abc</sup>        | 5.38 ± 0.01 <sup>ij</sup>    |
|    | Ruiana                    | T11 | 19.00 ± 0.03 <sup>rstuvwxy</sup>     | 2.24 ± 0.03 <sup>abcde</sup>     | 16.93 ± 0.01 <sup>nopq</sup>     | 11.99 ± 0.02 <sup>bcdefghij</sup>   | 10.99 ± 0.08 <sup>abcd</sup>   | 1300.55 ± 10.66 <sup>n</sup>       | n.d.                         |
|    | Savoye                    | J16 | 15.75 ± 0.09 <sup>hijklmnopqrs</sup> | n.d.                             | 5.31 ± 0.13 <sup>bcdefg</sup>    | 22.15 ± 0.92 <sup>lmnopqr</sup>     | 8.50 ± 0.63 <sup>abc</sup>     | 201.46 ± 13.64 <sup>bcdefg</sup>   | 6.86 ± 0.10 <sup>op</sup>    |
|    | Tarvisò                   | U06 | 9.44 ± 0.60 <sup>fghi</sup>          | 4.92 ± 0.23 <sup>bcdefghi</sup>  | 21.60 ± 0.02 <sup>klmnopq</sup>  | 11.78 ± 0.51 <sup>abcde</sup>       | 17.59 ± 0.27 <sup>abcdef</sup> | 724.62 ± 20.74 <sup>ijk</sup>      | 4.32 ± 0.03 <sup>h</sup>     |
|    | Tempuriva                 | O12 | 17.87 ± 0.05 <sup>mnopqrstuvw</sup>  | 2.10 ± 0.02 <sup>abcde</sup>     | 5.10 ± 0.12 <sup>abcdef</sup>    | 8.32 ± 0.16 <sup>abcd</sup>         | 21.82 ± 0.15 <sup>abcdef</sup> | n.d.                               | 1.12 ± 0.31 <sup>b</sup>     |
|    | Toumive                   | D11 | 11.47 ± 0.10 <sup>efg</sup>          | 1.74 ± 0.05 <sup>abcd</sup>      | 9.86 ± 0.02 <sup>fghijklm</sup>  | 39.40 ± 0.34 <sup>s</sup>           | 7.44 ± 0.05 <sup>abc</sup>     | n.d.                               | 6.44 ± 0.17 <sup>mno</sup>   |
| MT | Marron di Marradi IGP     | C03 | 7.57 ± 0.03 <sup>bcd</sup>           | 0.47 ± 0.01 <sup>a</sup>         | 6.43 ± 0.04 <sup>bcdefgh</sup>   | 13.68 ± 0.07 <sup>bcdefghij</sup>   | 40.92 ± 0.05 <sup>gh</sup>     | 557.30 ± 3.61 <sup>fghij</sup>     | 5.79 ± 0.06 <sup>ijkl</sup>  |
|    | Marron Comballe           | G19 | 14.27 ± 0.38 <sup>fghijklmn</sup>    | 1.04 ± 0.03 <sup>abc</sup>       | 3.77 ± 0.03 <sup>abcdef</sup>    | 14.16 ± 0.06 <sup>bcdefghij</sup>   | 5.53 ± 0.24 <sup>a</sup>       | 264.76 ± 2.11 <sup>bcdefghi</sup>  | 4.15 ± 0.01 <sup>fgh</sup>   |
|    | Marron de Chevanceaux     | L14 | 15.17 ± 0.20 <sup>ghijklmnopq</sup>  | 0.35 ± 0.26 <sup>a</sup>         | 1.79 ± 0.01 <sup>abc</sup>       | 9.06 ± 0.57 <sup>abcdef</sup>       | 7.19 ± 0.19 <sup>abc</sup>     | 6.75 ± 0.01 <sup>a</sup>           | n.d.                         |
|    | Marron de Goujounac       | F20 | 15.57 ± 0.08 <sup>hijklmnopqrs</sup> | 0.35 ± 0.04 <sup>a</sup>         | 6.39 ± 0.18 <sup>bcdefgh</sup>   | 15.84 ± 2.24 <sup>defghijklmn</sup> | 5.66 ± 0.30 <sup>a</sup>       | 320.08 ± 17.84 <sup>bcdefghi</sup> | n.d.                         |
|    | Marron de Lyon            | G23 | 15.34 ± 0.47 <sup>hijklmnopqr</sup>  | 0.16 ± 0.02 <sup>a</sup>         | 9.07 ± 0.76 <sup>efghijk</sup>   | 21.19 ± 0.51 <sup>jklmnopq</sup>    | 8.18 ± 0.09 <sup>abc</sup>     | 337.78 ± 26.97 <sup>cdefghij</sup> | 6.08 ± 0.53 <sup>lmn</sup>   |
|    | Marron de Redon           | K22 | 15.07 ± 0.13 <sup>shijklmnop</sup>   | 7.98 ± 0.01 <sup>fghij</sup>     | 7.25 ± 0.08 <sup>cdefghi</sup>   | 21.91 ± 0.09 <sup>jklmnopqr</sup>   | 8.92 ± 0.63 <sup>abcd</sup>    | 8.81 ± 0.03 <sup>a</sup>           | 5.24 ± 0.04 <sup>i</sup>     |

|                           |     |                                      |                               |                                   |                                     |                              |                                  |                            |
|---------------------------|-----|--------------------------------------|-------------------------------|-----------------------------------|-------------------------------------|------------------------------|----------------------------------|----------------------------|
| Marron d'Olargues         | F18 | 15.04 ± 0.15 <sup>ghijklmnop</sup>   | 9.44 ± 0.01 <sup>ij</sup>     | 15.76 ± 0.01 <sup>mnpq</sup>      | 19.64 ± 0.29 <sup>ijklmnopq</sup>   | 4.27 ± 0.07 <sup>a</sup>     | n.d.                             | 6.42 ± 0.09 <sup>mno</sup> |
| Marron Sauvage            | K20 | 8.38 ± 0.30 <sup>de</sup>            | 2.66 ± 0.02 <sup>abcdeg</sup> | 4.57 ± 0.01 <sup>abcdef</sup>     | 16.23 ± 0.05 <sup>efghijklmno</sup> | 5.70 ± 0.08 <sup>a</sup>     | n.d.                             | 6.62 ± 0.29 <sup>no</sup>  |
| Marrone della Val Pellice | V07 | 6.27 ± 0.13 <sup>bc</sup>            | n.d.                          | 9.48 ± 0.04 <sup>efghijklm</sup>  | 19.64 ± 0.01 <sup>ijklmnopq</sup>   | 9.56 ± 0.08 <sup>abcd</sup>  | n.d.                             | 6.59 ± 0.24 <sup>no</sup>  |
| Marrone di Castel del Rio | G08 | 16.79 ± 0.16 <sup>klmnopqrstuv</sup> | 0.24 ± 0.09 <sup>a</sup>      | 16.96 ± 0.69 <sup>nopq</sup>      | 8.14 ± 0.62 <sup>abcd</sup>         | 8.24 ± 0.02 <sup>abc</sup>   | 530.06 ± 25.98 <sup>ijk</sup>    | n.d.                       |
| Marrone di Chiusa Pesio   | G02 | 17.04 ± 0.18 <sup>klmnopqrstuv</sup> | n.d.                          | 14.02 ± 0.30 <sup>ijklmnopq</sup> | 14.49 ± 0.14 <sup>abcdegh</sup>     | 31.95 ± 0.62 <sup>efgh</sup> | 364.32 ± 11.05 <sup>efghij</sup> | 7.62 ± 0.41 <sup>q</sup>   |
| Marrone della Val di Susa | P16 | 14.29 ± 0.52 <sup>fghijklmn</sup>    | 2.15 ± 0.04 <sup>abcde</sup>  | 6.53 ± 0.07 <sup>abcdegh</sup>    | 11.99 ± 0.06 <sup>abcdeghi</sup>    | 7.21 ± 0.06 <sup>abc</sup>   | n.d.                             | 2.26 ± 0.32 <sup>c</sup>   |

Mean value ± standard deviation of each sample is given ( $n = 3$ ). Different letters ( $a, b, c, \dots, \delta$ ) for each descriptor indicate the significant differences at  $p \leq 0.05$ . N.d.: not detected. C. pumila hybrid (PH); Japanese chestnut (JC); Euro-Japanese hybrid (EH); sweet chestnut (SC); marrone-type chestnut (MT).

Table S3: Nutritional properties of analyzed chestnut cultivars.

| Cv. Type | Cultivar                            | ID  | Organic Acids<br>(mg/100 g <sub>DW</sub> ) | Sugars<br>(g/100 g <sub>DW</sub> )   |
|----------|-------------------------------------|-----|--------------------------------------------|--------------------------------------|
| PH       | <i>C. pumila</i> × <i>C. sativa</i> | K24 | 713.44 ± 40.43 <sup>abcde fghij</sup>      | 19.43 ± 1.22 <sup>abcde fghij</sup>  |
|          | Ginyose                             | D18 | 881.68 ± 16.25 <sup>abcde fghi</sup>       | 4.55 ± 1.30 <sup>abc</sup>           |
|          | Ishizuki                            | F23 | 719.86 ± 167.71 <sup>abcde fgh</sup>       | 16.93 ± 0.28 <sup>abcde fghij</sup>  |
| JC       | Ishizuki Precoce                    | O15 | 909.26 ± 27.73 <sup>abcde fgh</sup>        | 3.84 ± 0.06 <sup>ab</sup>            |
|          | Ishizuki Tardiva                    | E17 | 575.76 ± 64.68 <sup>abcde fg</sup>         | 4.28 ± 1.88 <sup>abc</sup>           |
|          | Tsukuba                             | G14 | 550.08 ± 107.04 <sup>abcde fgh</sup>       | 2.74 ± 0.86 <sup>a</sup>             |
| EH       | Bouche de Bétizac                   | I10 | 324.23 ± 2.25 <sup>abcde f</sup>           | 36.25 ± 0.14 <sup>ghijklm</sup>      |
|          | Colossal                            | M22 | 810.28 ± 43.29 <sup>abcde fghij</sup>      | 5.82 ± 0.65 <sup>abcde fghij</sup>   |
|          | Lusenta                             | M15 | 935.62 ± 2.51 <sup>bcde fghij</sup>        | 6.49 ± 1.31 <sup>abcde</sup>         |
|          | Maridonne                           | J14 | 607.84 ± 25.71 <sup>abcde fg</sup>         | 15.03 ± 1.03 <sup>abcde fghi</sup>   |
|          | Marigoule                           | J13 | 982.77 ± 1.34 <sup>cde fghij</sup>         | 3.53 ± 1.47 <sup>ab</sup>            |
|          | Marissard                           | N14 | 1171.26 ± 0.90 <sup>fghijkl</sup>          | 49.56 ± 0.35 <sup>fghijklm</sup>     |
|          | Marlhac                             | K05 | 577.82 ± 0.64 <sup>abcde fg</sup>          | 30.99 ± 1.12 <sup>cde fghijklm</sup> |
|          | Marsol                              | F06 | 1386.06 ± 42.83 <sup>hijkl</sup>           | 40.08 ± 0.61 <sup>ijklm</sup>        |
|          | Precoce Migoule                     | G18 | 1879.03 ± 4.06 <sup>l</sup>                | 4.37 ± 1.96 <sup>abc</sup>           |
|          | Vignols                             | I17 | 1454.87 ± 209.16 <sup>ikl</sup>            | 51.83 ± 0.02 <sup>klm</sup>          |
| SC       | Biancole Garfagnana                 | B03 | 849.24 ± 18.13 <sup>abcde fghij</sup>      | 4.83 ± 1.51 <sup>abcd</sup>          |
|          | Bouche Rouge                        | I18 | 561.78 ± 46.22 <sup>abcde fg</sup>         | 3.04 ± 0.04 <sup>ab</sup>            |
|          | Ciapastra                           | T02 | 566.00 ± 45.60 <sup>abcde fg</sup>         | 16.88 ± 0.12 <sup>abcde fgh</sup>    |
|          | Contessa                            | L02 | 459.03 ± 115.60 <sup>abcde f</sup>         | 25.56 ± 1.79 <sup>abcde fghijk</sup> |
|          | Dorée de Lyon                       | H23 | 493.96 ± 1.67 <sup>abcde f</sup>           | 3.27 ± 0.03 <sup>ab</sup>            |
|          | Epinerere                           | M16 | 309.97 ± 60.02 <sup>abcde f</sup>          | 15.24 ± 1.54 <sup>abcde fghi</sup>   |
|          | Gabiana                             | O03 | 637.77 ± 82.34 <sup>abcde fghij</sup>      | 13.89 ± 0.29 <sup>abcde fg</sup>     |
|          | Garrone Rosso                       | I03 | 899.78 ± 57.79 <sup>abcde fghij</sup>      | 3.02 ± 1.53 <sup>abcde</sup>         |
|          | Gentile                             | P12 | 172.38 ± 55.48 <sup>abcde fg</sup>         | 3.78 ± 1.21 <sup>ab</sup>            |
|          | Judia                               | F21 | 281.40 ± 53.12 <sup>abc</sup>              | 9.18 ± 1.66 <sup>abcde f</sup>       |
|          | Laguepie                            | H24 | 1449.85 ± 0.66 <sup>de fghijk</sup>        | 31.37 ± 0.01 <sup>de fghijklm</sup>  |
|          | Longal                              | E16 | 860.25 ± 14.53 <sup>abcde fgh</sup>        | 12.42 ± 3.67 <sup>abcde fgh</sup>    |
|          | Marrubia                            | Q13 | 976.44 ± 0.78 <sup>cde fghij</sup>         | 7.61 ± 0.03 <sup>abcde</sup>         |
|          | Neirana                             | U09 | 707.23 ± 57.63 <sup>abcde fghij</sup>      | 17.27 ± 0.64 <sup>abcde fghij</sup>  |
|          | Nerone                              | H08 | 716.63 ± 90.25 <sup>abcde fgh</sup>        | 13.83 ± 0.49 <sup>abcde fghi</sup>   |
|          | Primemura                           | X05 | 678.40 ± 22.25 <sup>abcde fg</sup>         | 4.28 ± 1.40 <sup>abc</sup>           |
|          | Primitiva di Roccamonfina           | I07 | 1390.76 ± 97.89 <sup>cde fghij</sup>       | 6.30 ± 0.96 <sup>abcde</sup>         |
|          | Pugnenga                            | P04 | 894.59 ± 0.98 <sup>abcde fghij</sup>       | 57.19 ± 3.74 <sup>m</sup>            |

|    |                           |     |                                      |                                      |
|----|---------------------------|-----|--------------------------------------|--------------------------------------|
|    | Rossane                   | N13 | 1151.17 ± 107.96 <sup>defghijk</sup> | 10.75 ± 2.21 <sup>abcdefg</sup>      |
|    | Rouffinette               | O11 | 1420.24 ± 0.62 <sup>ijkl</sup>       | 32.22 ± 1.52 <sup>efghijklm</sup>    |
|    | Ruiana                    | T11 | 966.65 ± 7.70 <sup>cdefghij</sup>    | 29.34 ± 0.17 <sup>bcddefghijkl</sup> |
|    | Savoye                    | J16 | 349.81 ± 34.71 <sup>abcd</sup>       | 7.11 ± 0.05 <sup>abcde</sup>         |
|    | Tarvisò                   | U06 | 683.63 ± 46.99 <sup>abcdefghi</sup>  | 11.02 ± 0.38 <sup>abcdef</sup>       |
|    | Tempuriva                 | O12 | 217.13 ± 4.28 <sup>abc</sup>         | 12.88 ± 0.03 <sup>abcdefgh</sup>     |
|    | Toumive                   | D11 | 1259.86 ± 6.18 <sup>bcddefghij</sup> | 53.78 ± 0.33 <sup>lm</sup>           |
| MT | Marron di Marradi IGP     | C03 | 809.08 ± 3.62 <sup>abcdefghij</sup>  | 4.93 ± 0.02 <sup>abcd</sup>          |
|    | Marron Comballe           | G19 | 709.03 ± 69.35 <sup>abcdefghij</sup> | 5.74 ± 2.50 <sup>abcde</sup>         |
|    | Marron de Chevanceaux     | L14 | 351.39 ± 58.12 <sup>abcde</sup>      | 11.66 ± 0.26 <sup>abcde</sup>        |
|    | Marron de Goujounac       | F20 | 575.06 ± 12.04 <sup>abcdefg</sup>    | 4.90 ± 0.58 <sup>ab</sup>            |
|    | Marron de Lyon            | G23 | 553.51 ± 32.28 <sup>abcdefgh</sup>   | 7.10 ± 1.55 <sup>abcde</sup>         |
|    | Marron de Redon           | K22 | 895.34 ± 0.32 <sup>abcdefghij</sup>  | 52.43 ± 2.52 <sup>lm</sup>           |
|    | Marron d'Olargues         | F18 | 804.68 ± 10.78 <sup>abcdefghij</sup> | 31.84 ± 0.65 <sup>abcdefghij</sup>   |
|    | Marron Sauvage            | K20 | 1419.77 ± 54.86 <sup>ijkl</sup>      | 5.21 ± 2.11 <sup>abcd</sup>          |
|    | Marrone della Val Pellice | V07 | 1574.82 ± 0.15 <sup>ghijkl</sup>     | 6.44 ± 2.28 <sup>abcdefghi</sup>     |
|    | Marrone di Castel del Rio | G08 | 942.16 ± 35.47 <sup>cdefghij</sup>   | 3.12 ± 1.41 <sup>ab</sup>            |
|    | Marrone di Chiusa Pesio   | G02 | 826.84 ± 73.81 <sup>abcdefghij</sup> | 21.81 ± 1.37 <sup>abcdefghij</sup>   |
|    | Marrone della Val di Susa | P16 | 1809.85 ± 70.63 <sup>kl</sup>        | 26.36 ± 0.36 <sup>abcdefghij</sup>   |

Mean value and standard deviation of each sample is given ( $n = 3$ ). Different letters (a,b,c,..., m) for each descriptor indicate the significant differences at  $p \leq 0.05$ . C. pumila hybrid (PH); Japanese chestnut (JC); Euro-Japanese hybrid (EH); Sweet chestnut (SC); Marrone-type chestnut (MT).
